# Supplementary material
Source: publisher site journal article supplement (https://www.dovepress.com/article/454925)
Supplement: Supplementary file 1 [file get_supplementary_file.php]

**Supplementary Table 1**

*Reliability test results of the perceived causes of overcrowding questionnaire*

| **Item** | **Sample** | **Item-test Correlation** | **Item-rest Correlation** | **Average Inter-item Covariance** | **α** |
| --- | --- | --- | --- | --- | --- |
| POC1 | 50 | 0.664 | 0.563 | .220 | 0.878 |
| POC2 | 50 | 0.897 | 0.853 | .180 | 0.854 |
| POC3 | 50 | 0.717 | 0.675 | .229 | 0.877 |
| POC4 | 50 | 0.851 | 0.808 | .200 | 0.862 |
| POC5 | 50 | 0.649 | 0.564 | .219 | 0.878 |
| POC6 | 50 | 0.621 | 0.501 | .213 | 0.885 |
| POC7 | 50 | 0.510 | 0.504 | .222 | 0.882 |
| POC8 | 50 | 0.831 | 0.764 | .188 | 0.862 |
| POC9 | 50 | 0.522 | 0.420 | .230 | 0.887 |
| POC10 | 50 | 0.739 | 0.649 | .200 | 0.872 |
| **Test Scale** |  |  |  | **.210** | **0.885** |

POC = Perceived overcrowding cause.

**Supplementary Table 2**

*Reliability test results of the perceived effects of overcrowding questionnaire*

| **Item** | **Sample** | **Item-test Correlation** | **Item-rest Correlation** | **Average Inter-item Covariance** | **α** |
| --- | --- | --- | --- | --- | --- |
| POE1 | 50 | 0.606 | 0.507 | .127 | 0.821 |
| POE2 | 50 | 0.571 | 0.466 | .128 | 0.824 |
| POE3 | 50 | 0.494 | 0.428 | .139 | 0.828 |
| POE4 | 50 | 0.722 | 0.645 | .120 | 0.811 |
| POE5 | 50 | 0.603 | 0.499 | .126 | 0.822 |
| POE6 | 50 | 0.517 | 0.427 | .134 | 0.827 |
| POE7 | 50 | 0.670 | 0.591 | .125 | 0.816 |
| POE8 | 50 | 0.474 | 0.368 | .135 | 0.831 |
| POE9 | 50 | 0.483 | 0.408 | .138 | 0.828 |
| POE10 | 50 | 0.562 | 0.470 | .131 | 0.824 |
| POE11 | 50 | 0.722 | 0.645 | .120 | 0.811 |
| POE12 | 50 | 0.532 | 0.413 | .130 | 0.829 |
| POE13 | 50 | 0.317 | 0.227 | .144 | 0.837 |
| POE14 | 50 | 0.576 | 0.463 | .127 | 0.825 |
| **Test Scale** |  |  |  | **.130** | **0.835** |

POE = Perceived overcrowding effect.
